# Supplementary material
Source: PubMed Central journal article supplement (PMC8044011)
Supplement: NIHMS1660879-supplement-1.pdf [file NIHMS1660879-supplement-1.pdf]

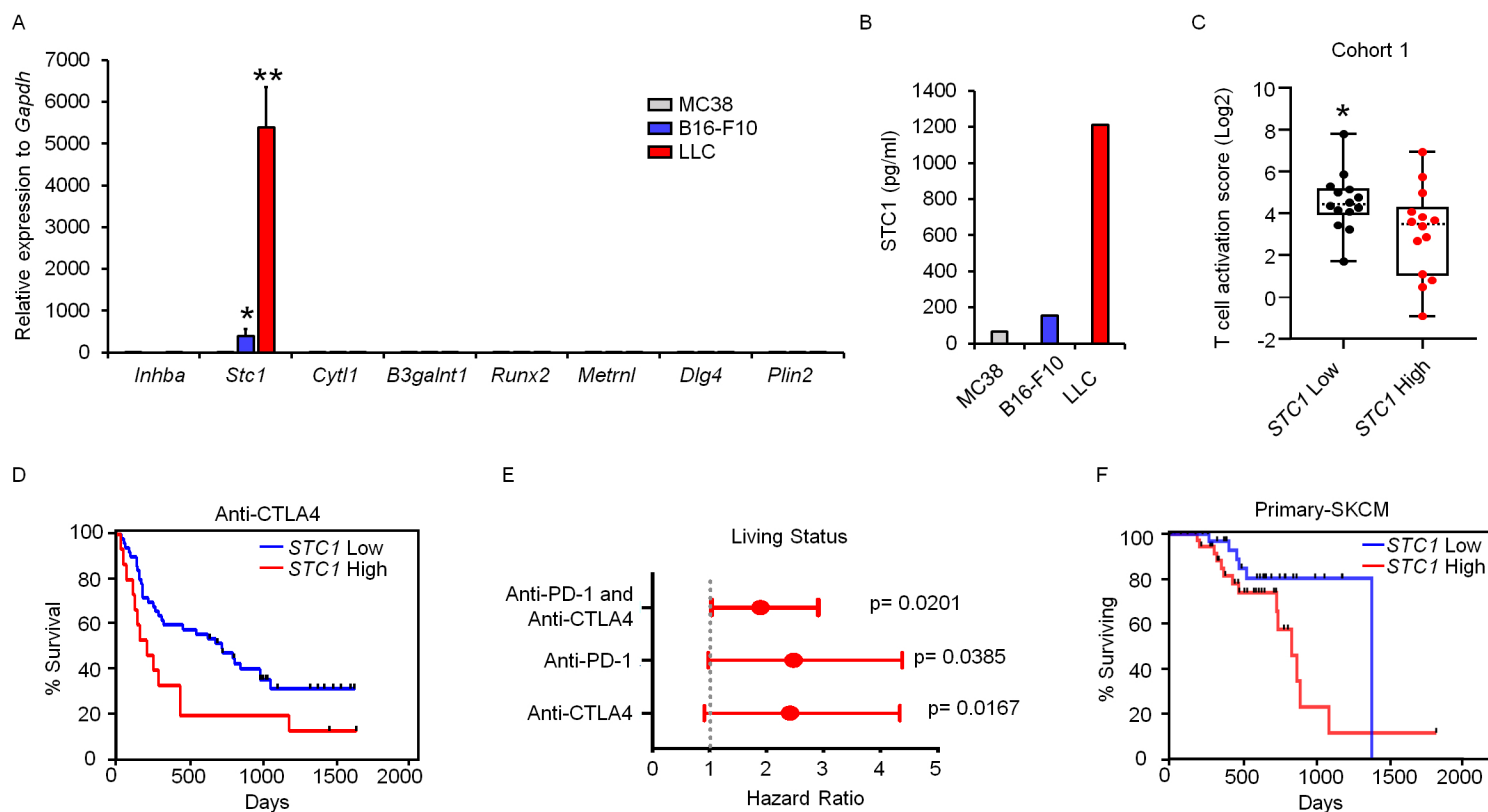

### Figure S1, related to Figure 1. *STC1* correlates to cancer resistance to immunotherapy

(A) qPCR showing the top 8 gene transcripts in murine tumor cell lines. Data are presented as mean  $\pm$  SEM, 2 tail T-test was used for two-way comparisons ( $n = 3-5$ ,  $*p < 0.05$ ,  $**p < 0.01$ ).

(B) Murine tumor *STC1* released in culture medium measured with ELISA. One of 3 experiments is shown.

(C) Relationship of *STC1* expression with T cell activation in cohort 1. ( $n = 14$ ,  $p = 0.031$ ). The dash line represents the median value, the bottom and top of the boxes are the 25<sup>th</sup> and 75<sup>th</sup> percentiles (interquartile range). Whiskers encompass 1.5 times the inter-quartile range.

(D) Relationship of *STC1* expression with cancer patient survival. Two combined cohorts treated with anti-CTLA4 (Van-Allen et al., 2015, Nathanson et al., 2017). High ( $n = 15$ ) and low ( $n = 50$ ) levels of *STC1* expression,  $p = 0.0167$ .

(E) Forest plot representing the adjust value of Cox proportional hazard ratio (HR) in patients treated with anti-PD-1, anti-CTLA4, and the combination as 95% confidential interval (CI) of overall survival.

(F) Relationship of *STC1* expression with cancer patient survival analyzed on primary SKCM. High ( $n = 38$ ) and low ( $n = 37$ ) levels of *STC1* expression,  $p = 0.0387$ .

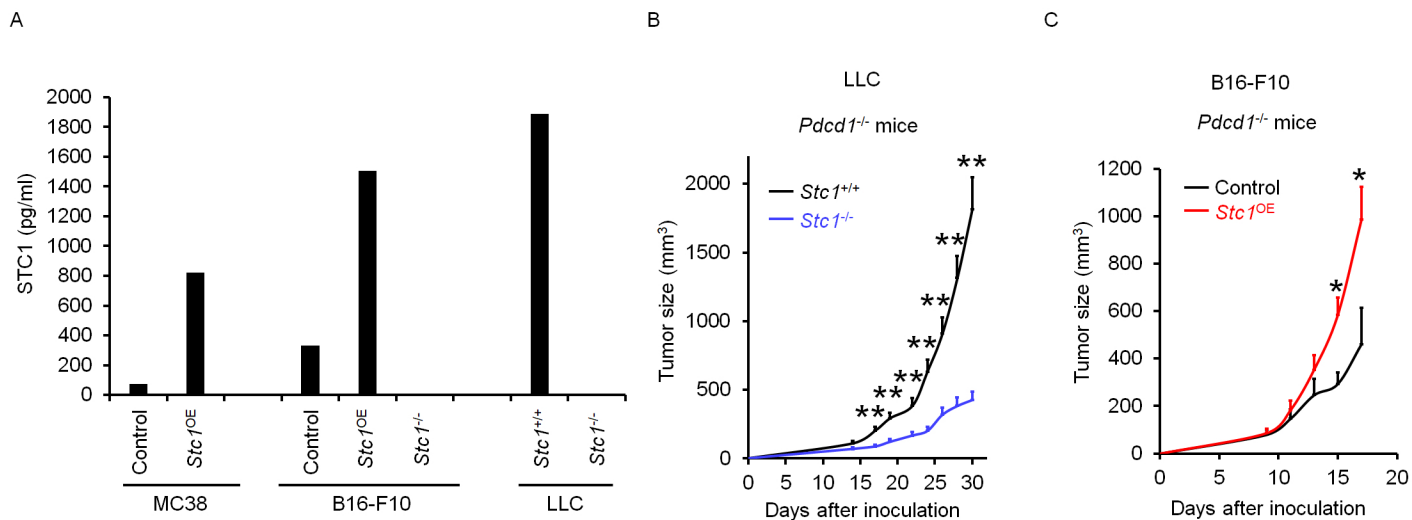

**Figure S2, related to Figure 2. Tumor STC1 is critical for intrinsic resistance to tumor immunity**

(A) Tumor STC1 released in culture measured with ELISA. One of 3 experiments is shown.

(B-C) Tumor growth curves of *Stc1*<sup>+/+</sup> and *Stc1*<sup>-/-</sup> LLC (B) or control and *Stc1*<sup>OE</sup> B16-F10 (C) in *Pdcd1*<sup>-/-</sup> C57BL/6J mice. Tumor volume was monitored. Data are shown as mean ± SEM, 2 tail T-test was used for two-way comparisons (n = 5-8, \*p < 0.05, \*\*p < 0.01).

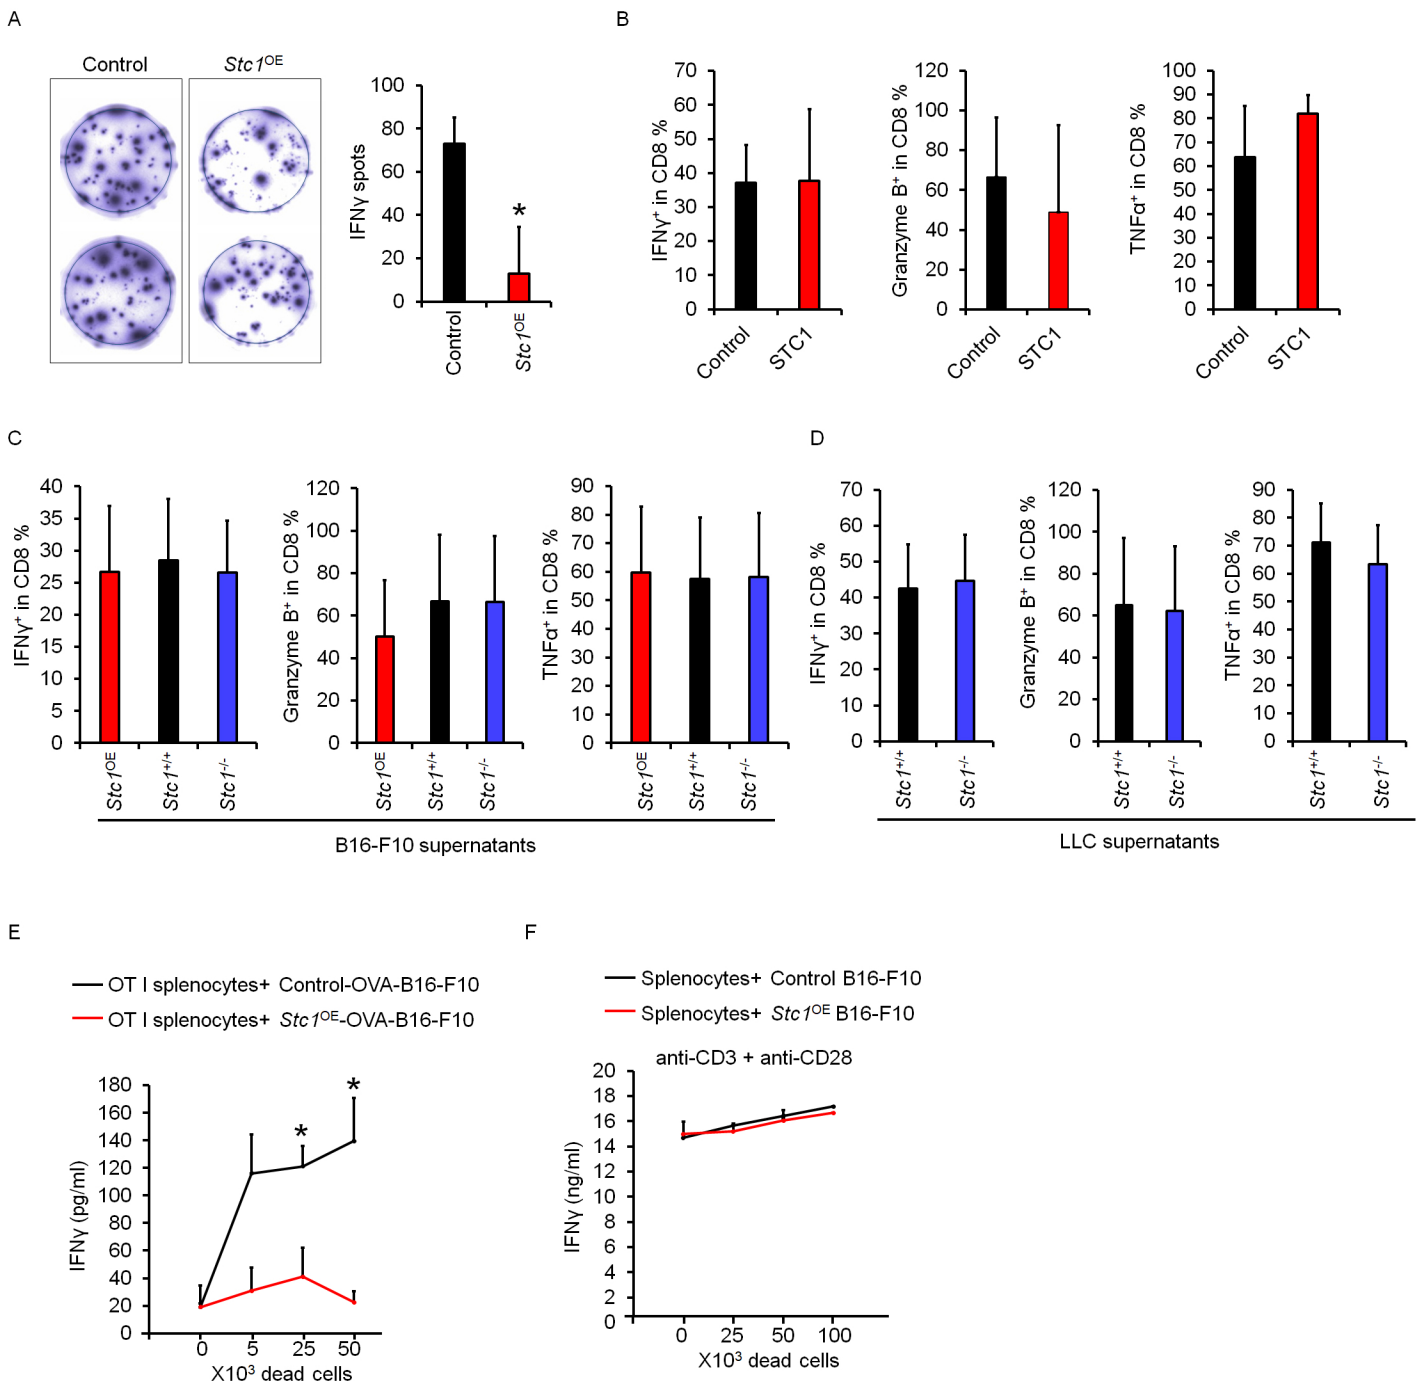

### Figure S3, related to Figure 3. Tumor STC1 impairs anti-tumor CD8<sup>+</sup> T cell responses

(A) IFN $\gamma$  ELISPOT in tumor drained lymph node T cells from mice bearing control or *Stc1<sup>OE</sup>* MC38 tumors. Data are shown as mean  $\pm$  SEM, 2 tail T-test was used for two-way comparisons (n = 5, \*p < 0.05).

(B-D) Effect of STC1 on T cell activation. Splenocytes were activated for 72 hours with anti-CD3 and anti-CD28 in the presence of recombinant STC1 (A), or B16-F10 cell culture supernatants (B), or LLC cells culture supernatants (C). FACS showed the percentages of IFN $\gamma^+$ , granzyme B $^+$ , and TNF $\alpha^+$ CD8 $^+$  T cells. Data are shown as mean  $\pm$  SEM, 2 tail T-test was used for two-way comparisons (n = 3, \*p < 0.05).

(E) Effect of STC1 on OT-I cell activation. OT-I splenocytes were cultured with dead tumor cells from OVA loaded-B16-F10 cells and OVA loaded- *Stc1<sup>OE</sup>*-B16-F10 cells for 3 days. ELISA showed IFN $\gamma$  production. Data are shown as mean  $\pm$  SEM, 2 tail T-test was used for two-way comparisons (n = 3-4, \*p < 0.05).

(F) Effect of STC1 on T cell activation. Splenocytes were activated with anti-CD3 and anti-CD28 for 72 hours in the presence or absence of dead tumor cells from B16-F10 control and *Stc1<sup>OE</sup>* cells. ELISA showed IFN $\gamma$  production. Data are shown as mean  $\pm$  SEM (n = 3-4, \*p < 0.05).

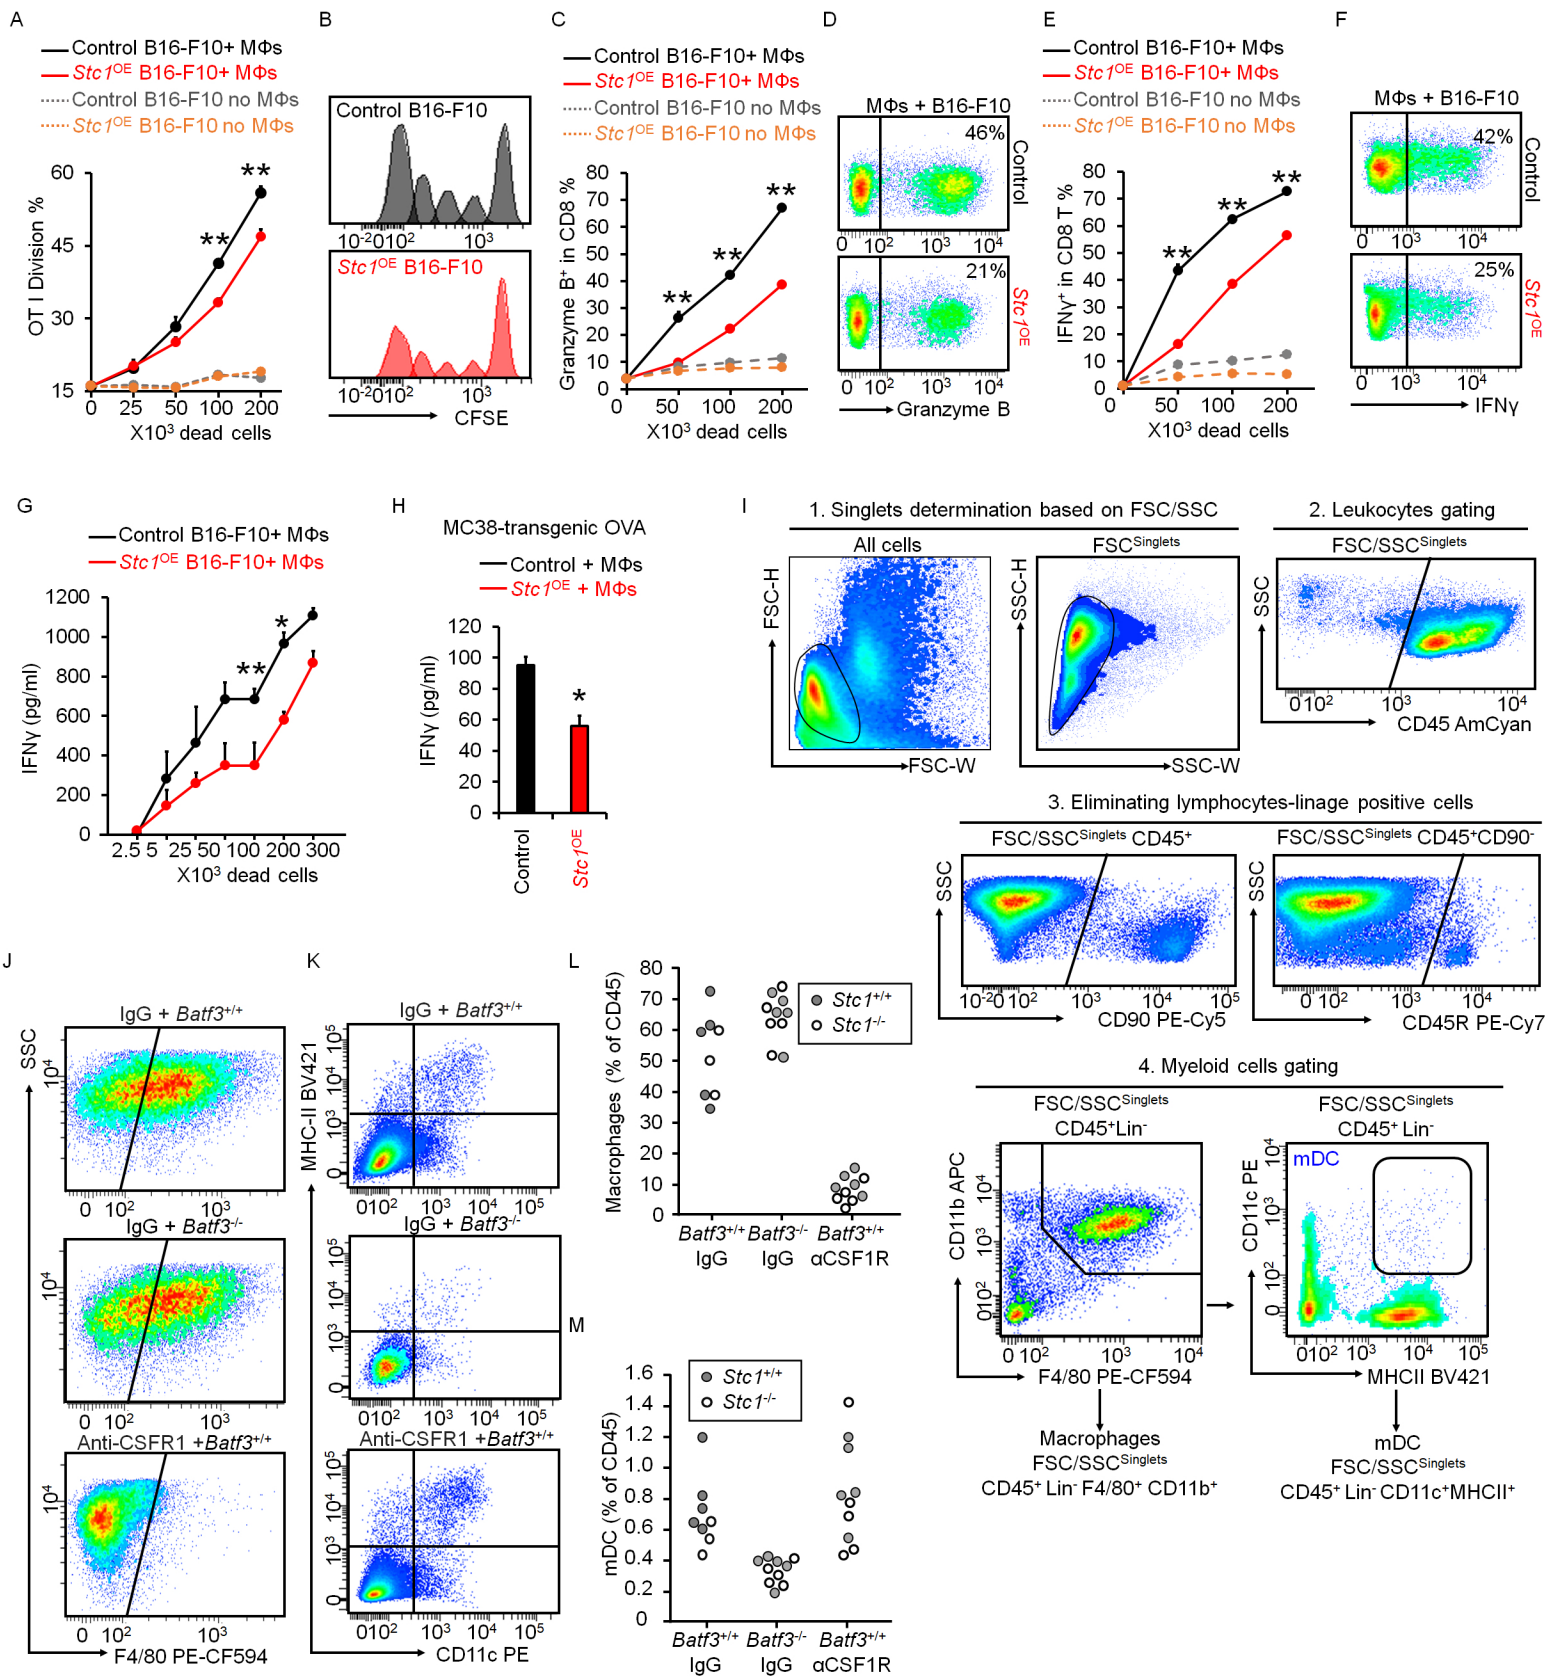

#### **Figure S4, related to Figure 4. STC1 abrogates tumor immunogenicity via targeting APCs**

(A-F) Effect of STC1 on OT-I cell activation. B16-F10 cells and *Stc1<sup>OE</sup>* B16-F10 cells were loaded with OVA and killed with UV-irradiation. CFSE-labeled OT-I cells were cultured for 3 days with different numbers of dead B16-F10 cells and *Stc1<sup>OE</sup>* B16-F10 cells in the presence of macrophages. FACS showed CFSE dilution (A-B), granzyme B<sup>+</sup> (C-D), and IFN $\gamma$ <sup>+</sup> (E-F) OT-I cells. Data are presented as mean  $\pm$  SEM, 2 tail T-test was used for two-way comparisons (n = 4-5, \* $p$  < 0.05, \*\* $p$  < 0.01).

(G) ELISA detected OT-I cell released IFN $\gamma$  in the setting as (A-F). Data are presented as mean  $\pm$  SEM, 2 tail T-test was used for two-way comparisons (n = 4-5, \* $p$  < 0.05, \*\* $p$  < 0.01).

(H) ELISA detected OT-I cell released IFN $\gamma$ . The experimental setting is similar to (A-F), but OVA-loaded B16-F10 cells were replaced with OVA transgenic control or *Stc1<sup>OE</sup>* MC38 cells. Data are presented as mean  $\pm$  SEM, 2 tail T-test was used for two-way comparisons (n = 5, \* $p$  < 0.05).

(I) Representative FACS gating strategy to define tumor-infiltrating myeloid subsets from LLC tumors.

(J-M) FACS showing the changes of macrophages and DCs in LLC tumors under the treatment of IgG or anti-CSF1R in WT or *Batf3<sup>-/-</sup>* mice.

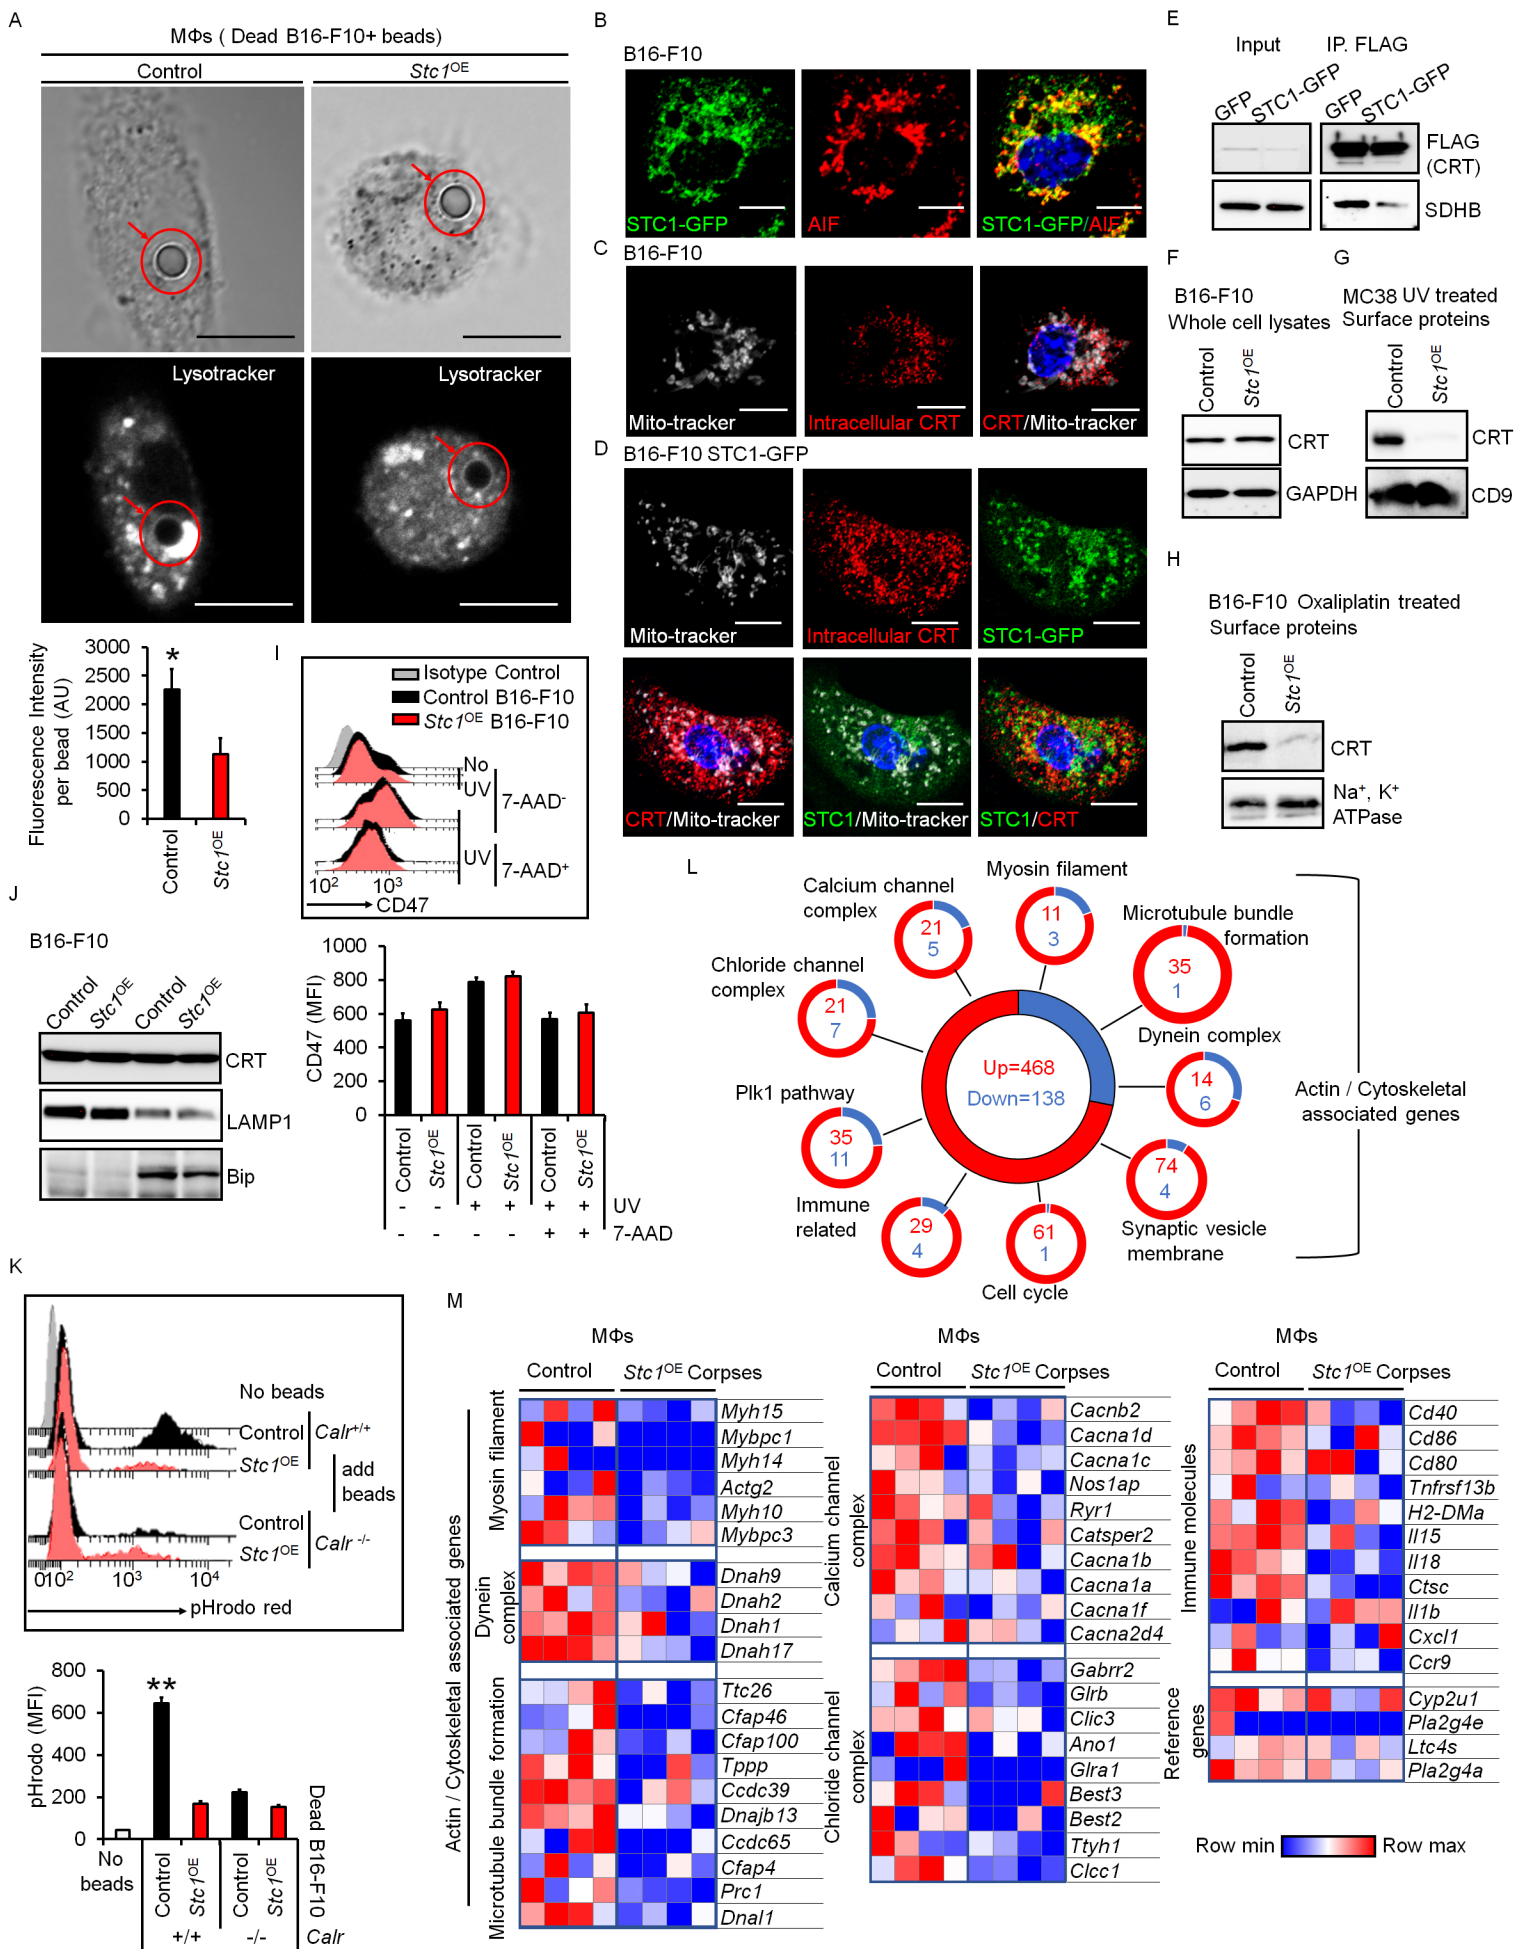

### Figure S5, related to Figure 5. Tumor STC1 traps CRT to inhibit macrophage function

(A) Effect of STC1 on macrophage-mediated bead up-take. Macrophages were incubated with dead cells from B16-F10 cells and *Stc1*<sup>OE</sup> B16-F10 cells. Latex beads were added (arrow). Macrophages were stained with lysotracker dye (white). Scale bars: 10  $\mu$ m. Results are shown as the fluorescence intensity of lysotracker dye at the bead areas in macrophage phagosomes, mean  $\pm$  SEM (n = 6, \*\*p < 0.05).

(B) Localization of STC1. UV-treated STC1-GFP expressing B16-F10 cells were stained for GFP (STC1-GFP) (Green), AIF (red), and DAPI (blue). Confocal images showed the co-localization of STC1 and AIF. Scale bars: 10  $\mu$ m. One of 3 experiments is shown.

(C) Localization of CRT. UV-treated B16-F10 cells were stained for mito-tracker (white), CRT (Red) and DAPI (blue). Confocal images showed the co-localization of mito-tracker and CRT. Scale bars: 10  $\mu$ m. One of 3 is shown.

(D) Co-localization of STC1 and CRT. UV-treated STC1-GFP expressing B16-F10 cells were stained for mito-tracker (white), CRT (Red), GFP (STC1-GFP) (Green), and DAPI (blue). Confocal images showed the co-localization of mito-tracker, CRT, and STC1 (STC1-GFP) (Green). Scale bars: 10  $\mu$ m. One of 3 experiments is shown.

(E) Co-IPs of CRT-FLAG with SDHB were performed in cell lysates from UV-treated B16-F10 cells. One of 2 experiments is shown.

(F) Western blots showing expression of CRT in whole cell lysates from UV-treated B16-F10 cells and *Stc1*<sup>OE</sup> B16-F10 cells. One of 2 experiments is shown.

(G) MC38 cell membrane CRT. Surface proteins from UV-treated or un-treated MC38 vehicle control cells and *Stc1*<sup>OE</sup> cells were labeled with biotin. Western blots showed cell membrane CRT and CD9 in biotin-labeled proteins. CD9 serves as membrane protein control. One of 2 experiments is shown.

(H) B16-F10 cell membrane CRT. Surface proteins from oxaliplatin treated B16-F10 control cells and *Stc1*<sup>OE</sup> cells were labeled with biotin. Western blots showed cell membrane CRT and Na<sup>+</sup>, K<sup>+</sup> ATPase  $\alpha$ 1 in biotin-labeled proteins. Na<sup>+</sup>, K<sup>+</sup> ATPase  $\alpha$ 1 serves as membrane protein control. One of 2 experiments is shown.

(I) FACS showing mean fluorescence intensity (MFI) of CD47 on UV-treated or un-treated B16-F10 control cells and *Stc1*<sup>OE</sup> cells. Gated on either 7-AAD<sup>-</sup> or 7-AAD<sup>+</sup>. Data are shown as mean  $\pm$  SEM (n = 4).

(J) Western blots showing distribution of CRT in lysosome (LAMP1) and ER (Bip) from UV-treated B16-F10 cells and *Stc1*<sup>OE</sup> B16-F10 cells. One of 2 experiments is shown.

(K) Macrophage-mediated bead up-take. Macrophages were incubated with dead cells from *Calr*<sup>+/+</sup> or *Calr*<sup>-/-</sup> B16-F10 and *Stc1*<sup>OE</sup> B16-F10 cells for 20 hours. pHrodo™-SE labeled 3  $\mu$ m latex beads were added for an additional 1 hour. FACS showed mean red fluorescence intensity (MFI) in macrophages. Gated on CD11b<sup>+</sup>CD45<sup>+</sup>. Data are shown as mean  $\pm$  SEM (n = 4, \*\*p < 0.01).

(L-M) RNA-seq of macrophages engulfed control B16-F10 tumors and *Stc1*<sup>OE</sup> B16-F10 tumors. Gene signatures were normalized to macrophages without engulfment. The heatmap depicts representative gene clusters differentially expressed between macrophages engulfed control B16-F10 tumors and *Stc1*<sup>OE</sup> B16-F10 tumors.

**Table S1, related to Figure 5. Mass spectrometry analysis of proteins interacting with STC1**

| Identified Proteins                                                   | Accession Number               | Total Spectrum Count |                      | Ratio (STC1 <sup>FLAG</sup> /Control) |
|-----------------------------------------------------------------------|--------------------------------|----------------------|----------------------|---------------------------------------|
|                                                                       |                                | Control              | STC1 <sup>FLAG</sup> |                                       |
| Stanniocalcin-1                                                       | sp O55183 STC1_MOUSE           | 0                    | 71                   | N/A                                   |
| Protein disulfide-isomerase A3                                        | sp P27773 PDIA3_MOUSE          | 0                    | 31                   | N/A                                   |
| Metastasis-associated protein MTA2                                    | sp Q9R190 MTA2_MOUSE           | 0                    | 26                   | N/A                                   |
| Calreticulin                                                          | sp P14211 CALR (CRT)_MOUSE     | 0                    | 19                   | N/A                                   |
| Transforming acidic coiled-coil-containing protein 1                  | sp Q6Y685 TACC1_MOUSE          | 0                    | 17                   | N/A                                   |
| Heat shock protein HSP 90-alpha                                       | sp P07901 HS90A_MOUSE          | 0                    | 10                   | N/A                                   |
| Elongation factor 1-alpha 1                                           | sp P10126 EF1A1_MOUSE          | 0                    | 9                    | N/A                                   |
| Intracellular hyaluronan-binding protein 4                            | tr E9QKB2 E9QKB2_MOUSE         | 0                    | 9                    | N/A                                   |
| Isoform 2 of 14-3-3 protein theta                                     | sp P68254-2 1433T_MOUSE        | 0                    | 8                    | N/A                                   |
| U5 small nuclear ribonucleoprotein 200 kDa helicase                   | sp Q6P4T2 U520_MOUSE           | 0                    | 7                    | N/A                                   |
| 14-3-3 protein eta                                                    | sp P68510 1433F_MOUSE          | 0                    | 7                    | N/A                                   |
| Tight junction protein ZO-1                                           | sp P39447 ZO1_MOUSE            | 0                    | 6                    | N/A                                   |
| Methyl-CpG-binding domain protein 2                                   | sp Q9Z2E1 MBD2_MOUSE           | 0                    | 6                    | N/A                                   |
| Protein disulfide-isomerase A6                                        | tr Q3TML0 Q3TML0_MOUSE         | 0                    | 6                    | N/A                                   |
| Pre-mRNA-processing-splicing factor 8                                 | sp Q99PV0 PRP8_MOUSE           | 0                    | 5                    | N/A                                   |
| Polyadenylate-binding protein 1                                       | sp P29341 PABP1_MOUSE          | 0                    | 5                    | N/A                                   |
| 26S protease regulatory subunit 7                                     | tr Q8BVQ9 Q8BVQ9_MOUSE         | 0                    | 5                    | N/A                                   |
| Nucleophosmin                                                         | sp Q61937 NPM_MOUSE            | 0                    | 5                    | N/A                                   |
| Protein RCC2                                                          | sp Q8BK67 RCC2_MOUSE           | 0                    | 5                    | N/A                                   |
| Tubulin beta-5 chain                                                  | sp P99024 TBB5_MOUSE           | 0                    | 5                    | N/A                                   |
| Eukaryotic translation initiation factor 3 subunit C                  | sp Q8R1B4 EIF3C_MOUSE          | 0                    | 5                    | N/A                                   |
| Isoform 2 of F-actin-capping protein subunit beta                     | sp P47757-2 CAPZB_MOUSE        | 0                    | 5                    | N/A                                   |
| Dynactin subunit 2                                                    | sp Q99KJ8 DCTN2_MOUSE          | 0                    | 5                    | N/A                                   |
| Chromobox protein homolog 3                                           | sp P23198 CBX3_MOUSE           | 0                    | 5                    | N/A                                   |
| Endoplasmic                                                           | sp P08113 ENPL_MOUSE           | 0                    | 5                    | N/A                                   |
| Chromodomain-helicase-DNA-binding protein 4                           | sp Q6PDQ2 CHD4_MOUSE           | 0                    | 4                    | N/A                                   |
| Aminoacyl tRNA synthase complex-interacting multifunctional protein 1 | sp P31230 AIMP1_MOUSE          | 0                    | 4                    | N/A                                   |
| Cyclin-dependent kinase 2-associated protein 1                        | sp O35207 CDKA1_MOUSE          | 0                    | 4                    | N/A                                   |
| Single-stranded DNA-binding protein                                   | tr Q8R2K3 Q8R2K3_MOUSE         | 0                    | 4                    | N/A                                   |
| TBC1 domain family member 5                                           | sp Q80XQ2 TBCD5_MOUSE          | 0                    | 4                    | N/A                                   |
| Pre-mRNA-splicing factor RBM22                                        | sp Q8BHS3 RBM22_MOUSE          | 0                    | 4                    | N/A                                   |
| 10 kDa heat shock protein, mitochondrial                              | sp Q64433 CH10_MOUSE           | 0                    | 4                    | N/A                                   |
| Src substrate cortactin                                               | sp Q60598 SRC8_MOUSE           | 0                    | 4                    | N/A                                   |
| Peroxisome oxidoreductin-2                                            | sp Q61171 PRDX2_MOUSE          | 0                    | 4                    | N/A                                   |
| 40S ribosomal protein S19                                             | sp Q9CZX8 RS19_MOUSE           | 0                    | 4                    | N/A                                   |
| 60S acidic ribosomal protein P0                                       | sp P14869 RLA0_MOUSE           | 0                    | 4                    | N/A                                   |
| Elongation factor 2                                                   | sp P58252 EF2_MOUSE            | 0                    | 4                    | N/A                                   |
| Protein TSSC4                                                         | sp Q9JHE7 TSSC4_MOUSE          | 0                    | 4                    | N/A                                   |
| Tubulin beta-4B chain                                                 | sp P68372 TBB4B_MOUSE          | 0                    | 4                    | N/A                                   |
| Isoleucine--tRNA ligase, cytoplasmic                                  | sp Q8BU30 SYIC_MOUSE           | 0                    | 3                    | N/A                                   |
| Protein Qars                                                          | tr D3Z158 D3Z158_MOUSE         | 0                    | 3                    | N/A                                   |
| KN motif and ankyrin repeat domain-containing protein 4               | sp Q6P9J5 KANK4_MOUSE          | 0                    | 3                    | N/A                                   |
| Stromal cell-derived factor 2                                         | tr A0A0R4IZW9 A0A0R4IZW9_MOUSE | 0                    | 3                    | N/A                                   |
| Alpha-centractin                                                      | sp P61164 ACTZ_MOUSE           | 0                    | 3                    | N/A                                   |
| Elongation factor 1-gamma                                             | sp Q9D8N0 EF1G_MOUSE           | 0                    | 3                    | N/A                                   |
| oxoglutarate dehydrogenase complex, mitochondrial                     | sp Q9D2G2 ODO2_MOUSE           | 0                    | 3                    | N/A                                   |
| U2 small nuclear ribonucleoprotein A                                  | sp P57784 RU2A_MOUSE           | 0                    | 3                    | N/A                                   |
| Protein disulfide-isomerase                                           | sp P09103 PDIA1_MOUSE          | 0                    | 3                    | N/A                                   |
| Eukaryotic translation initiation factor 3 subunit G                  | sp Q9Z1D1 EIF3G_MOUSE          | 0                    | 3                    | N/A                                   |
| PERQ amino acid-rich with GYF domain-containing protein 2             | sp Q6Y7W8 PERQ2_MOUSE          | 0                    | 3                    | N/A                                   |
| Eukaryotic translation initiation factor 3 subunit K                  | sp Q9DBZ5 EIF3K_MOUSE          | 0                    | 3                    | N/A                                   |
| 60S ribosomal protein L12                                             | sp P35979 RL12_MOUSE           | 0                    | 3                    | N/A                                   |
| Isoform 2 of Polycomb protein EED                                     | sp Q921E6-2 EED_MOUSE          | 0                    | 3                    | N/A                                   |



|                                                                   |                                |    |     |     |
|-------------------------------------------------------------------|--------------------------------|----|-----|-----|
| 40S ribosomal protein SA                                          | sp P14206 RSSA_MOUSE           | 0  | 3   | N/A |
| Reticulocalbin-2                                                  | sp Q8BP92 RCN2_MOUSE           | 0  | 3   | N/A |
| Nucleolar RNA helicase 2                                          | sp Q9JIK5 DDX21_MOUSE          | 0  | 3   | N/A |
| Complement component 1 Q subcomponent-binding protein             | tr Q8R5L1 Q8R5L1_MOUSE         | 0  | 3   | N/A |
| Small nuclear ribonucleoprotein Sm D1                             | sp P62315 SMD1_MOUSE           | 0  | 3   | N/A |
| 26S protease regulatory subunit 6B                                | sp P54775 PRS6B_MOUSE          | 0  | 3   | N/A |
| 40S ribosomal protein S20                                         | sp P60867 RS20_MOUSE           | 0  | 3   | N/A |
| Eukaryotic translation initiation factor 3 subunit M              | sp Q99JX4 EIF3M_MOUSE          | 0  | 3   | N/A |
| Endoplasmic reticulum resident protein 29                         | sp P57759 ERP29_MOUSE          | 0  | 3   | N/A |
| Vesicle-associated membrane protein-associated protein B          | sp Q9QY76 VAPB_MOUSE           | 0  | 3   | N/A |
| 26S proteasome non-ATPase regulatory subunit 11                   | sp Q8BG32 PSD11_MOUSE          | 0  | 3   | N/A |
| Isoform 2 of Poly(U)-binding-splicing factor PUF60                | sp Q3UEB3-2 PUF60_MOUSE        | 0  | 3   | N/A |
| Aspartate--tRNA ligase, cytoplasmic                               | sp Q922B2 SYDC_MOUSE           | 0  | 3   | N/A |
| Isoform 2 of Peptidyl-prolyl cis-trans isomerase H                | sp Q9D868-2 PPIIH_MOUSE        | 0  | 3   | N/A |
| Polyadenylate-binding protein 2                                   | sp Q8CCS6 PABP2_MOUSE          | 0  | 2   | N/A |
| LanC-like protein 1                                               | sp O89112 LANC1_MOUSE          | 0  | 2   | N/A |
| Collagen alpha-5(VI) chain                                        | sp A6H584 CO6A5_MOUSE          | 0  | 2   | N/A |
| Probable cytosolic iron-sulfur protein assembly protein CIAO1     | sp Q99KN2 CIAO1_MOUSE          | 0  | 2   | N/A |
| Eukaryotic translation initiation factor 4B                       | sp Q8BGD9 IF4B_MOUSE           | 0  | 2   | N/A |
| U1 small nuclear ribonucleoprotein A (Fragment)                   | tr D3Z0S6 D3Z0S6_MOUSE         | 0  | 2   | N/A |
| Dehydrogenase/reductase SDR family member 4                       | sp Q99LB2 DHRS4_MOUSE          | 0  | 2   | N/A |
| Ferritin light chain 1                                            | sp P29391 FRIL1_MOUSE          | 0  | 2   | N/A |
| Coatomer subunit beta                                             | sp O55029 COPB2_MOUSE          | 0  | 2   | N/A |
| CD2 antigen cytoplasmic tail-binding protein 2                    | sp Q9CWX3 CD2B2_MOUSE          | 0  | 2   | N/A |
| Leucine--tRNA ligase, cytoplasmic                                 | sp Q8BMJ2 SYLC_MOUSE           | 0  | 2   | N/A |
| mitochondrial                                                     | sp Q9CQA3 SDHB_MOUSE           | 2  | 17  | 8.5 |
| Rho guanine nucleotide exchange factor (GEF7), isoform CRA_a      | tr A0A0R4J0X8 A0A0R4J0X8_MOUSE | 4  | 23  | 5.8 |
| (Bos taurus) similar to alpha-tubulin I isoform 1                 | ENSEMBL:ENSBTAP00000016242     | 2  | 9   | 4.5 |
| Isoform 2 of Cellular nucleic acid-binding protein                | sp P53996-2 CNBP_MOUSE         | 3  | 12  | 4.0 |
| Stromal cell-derived factor 2-like protein 1                      | sp Q9ESP1 SDF2L_MOUSE          | 3  | 11  | 3.7 |
| Transcriptional repressor p66-beta                                | sp Q8VHR5 P66B_MOUSE           | 14 | 46  | 3.3 |
| Isoform 2 of Methyl-CpG-binding domain protein 3                  | sp Q9Z2D8-2 MBD3_MOUSE         | 5  | 16  | 3.2 |
| Metastasis-associated protein MTA1                                | sp Q8K4B0 MTA1_MOUSE           | 15 | 44  | 2.9 |
| Transcriptional repressor p66 alpha                               | sp Q8CHY6 P66A_MOUSE           | 13 | 38  | 2.9 |
| Splicing factor 3B subunit 3                                      | sp Q921M3 SF3B3_MOUSE          | 5  | 14  | 2.8 |
| Bifunctional glutamate/proline--tRNA ligase                       | sp Q8CGC7 SYEP_MOUSE           | 6  | 16  | 2.7 |
| Lysine--tRNA ligase                                               | sp Q99MN1 SYK_MOUSE            | 9  | 24  | 2.7 |
| Elongation factor 1-delta                                         | sp P57776 EF1D_MOUSE           | 2  | 5   | 2.5 |
| Elongation factor 1-beta                                          | sp O70251 EF1B_MOUSE           | 4  | 10  | 2.5 |
| 116 kDa U5 small nuclear ribonucleoprotein component              | sp O08810 U5S1_MOUSE           | 4  | 10  | 2.5 |
| Transmembrane glycoprotein NMB                                    | sp Q99P91 GPNMB_MOUSE          | 6  | 15  | 2.5 |
| Isoform 3 of Transforming acidic coiled-coil-containing protein 2 | sp Q9JJG0-3 TACC2_MOUSE        | 43 | 105 | 2.4 |
| cAMP-dependent protein kinase type I-alpha regulatory subunit     | sp Q9DBC7 KAP0_MOUSE           | 5  | 12  | 2.4 |
| Peroxiredoxin-1                                                   | sp P35700 PRDX1_MOUSE          | 3  | 7   | 2.3 |
| Isoform HSP105-beta of Heat shock protein 105 kDa                 | sp Q61699-2 HS105_MOUSE        | 4  | 9   | 2.3 |
